# Supplementary material for: Mitochondrial 8-hydroxy-2′-deoxyguanosine and coronary artery disease in patients with type 2 diabetes mellitus
Source: PubMed Central journal article supplement (PMC7029479; doi:10.1186/s12933-020-00998-6), 2020-02-19
Supplement: 12933_2020_998_MOESM1_ESM.pdf [file 12933_2020_998_MOESM1_ESM.pdf]

## **Definitions of composites of MACCE**

All-cause death was defined as death from any cause. Cardiac death was defined as any death due to immediate cardiac cause, procedure-related deaths, and deaths without a clear noncardiac cause. MI was defined as ischaemic signs or symptoms and new pathological Q-waves in  $\geq 2$  contiguous ECG leads, or/and an elevation CK-MB or troponin above the 99<sup>th</sup> percentile limit of normal and at least  $\geq 20\%$  above the most recent value. Stroke was defined as a focal neurologic deficit of central origin lasting  $>72$  hours, or a focal neurologic deficit of central origin lasting  $>24$  hours, with imaging evidence of cerebral infarction or intracerebral hemorrhage. Repeat revascularization was defined as any repeat PCI or CABG. All stages of a staged index PCI procedure would be considered part of the index revascularization procedure and not a repeated revascularization.
