# Supplementary material for: Mitochondrial 8-hydroxy-2′-deoxyguanosine and coronary artery disease in patients with type 2 diabetes mellitus
Source: PubMed Central journal article supplement (PMC7029479; doi:10.1186/s12933-020-00998-6), 2020-02-19
Supplement: 12933_2020_998_MOESM3_ESM.pdf [file 12933_2020_998_MOESM3_ESM.pdf]

**Table S1. Associations of mtDNA 8-OHdG with 1-year clinical outcomes stratified by revascularization modality.**

| Clinical outcome         | PCI group (n = 475)     |                       | CABG group (n = 226)    |                       | <i>P</i> <sub>interaction</sub> <sup>b</sup> |
|--------------------------|-------------------------|-----------------------|-------------------------|-----------------------|----------------------------------------------|
|                          | HR (95%CI) <sup>a</sup> | <i>P</i> <sup>a</sup> | HR (95%CI) <sup>a</sup> | <i>P</i> <sup>a</sup> |                                              |
| MACE                     | 1.57 (1.28-1.93)        | < 0.001               | 1.58 (1.12-2.22)        | 0.009                 | 0.98                                         |
| All-cause death          | 2.00 (1.51-2.67)        | < 0.001               | 1.73 (1.00-2.98)        | 0.048                 | 0.64                                         |
| Cardiac death            | 2.01 (1.33-3.03)        | < 0.001               | 1.33 (0.63-2.80)        | 0.454                 | 0.34                                         |
| Repeat revascularization | 1.28 (0.94-1.73)        | 0.114                 | 1.48 (0.89-2.46)        | 0.131                 | 0.63                                         |
| MI/stroke                | 1.35 (0.89-2.05)        | 0.159                 | 1.64 (0.43-6.33)        | 0.472-                | 0.79                                         |

<sup>a</sup> Models were adjusted for age, sex, smoking habit, alcohol drinking habit, overweight/obesity, hypertension, dyslipidemia., FPG, HbA1c, diabetes duration, and type of diabetes management.

<sup>b</sup> *P*<sub>interaction</sub> was obtained from the  $\chi^2$ -based Q test.
